# Supplementary material
Source: publisher figshare collection journal article supplement (https://asha.figshare.com/articles/dataset/_/13641320)
Supplement: Supplementary file 1 [file 1]

**Supplemental Material S1.** Dominance analyses.

|              |             |                 | x1           | x2       | x3           | x4        | x5           | x6      |
|--------------|-------------|-----------------|--------------|----------|--------------|-----------|--------------|---------|
| Subset Model |             | NR <sup>2</sup> | clitics      | articles | verbs        | adjective | subjunctive  | plurals |
| x1           | clitics     | 0.734           |              | 0.007    | 0.045        | 0.021     | 0.039        | 0.000   |
| x2           | articles    | 0.590           | 0.151        |          | 0.166        | 0.060     | 0.001        | 0.001   |
| x3           | verbs       | 0.754           | 0.025        | 0.002    |              | 0.007     | 0.044        | 0.000   |
| x4           | adjective   | 0.609           | 0.146        | 0.041    | 0.152        |           | 0.122        | 0.000   |
| x5           | subjunctive | 0.655           | 0.118        | 0.051    | 0.143        | 0.076     |              | 0.011   |
| x6           | plurals     | 0.357           | 0.377        | 0.234    | 0.397        | 0.252     | 0.309        |         |
| average      |             |                 | <b>0.163</b> | 0.067    | <b>0.181</b> | 0.083     | <b>0.103</b> | 0.002   |

| Pairs | NR <sup>2</sup> |
|-------|-----------------|
| x1x2  | 0.741           |
| x1x3  | 0.779           |
| x1x4  | 0.755           |
| x1x5  | 0.773           |
| x1x6  | 0.734           |
| x2x3  | 0.756           |
| x2x4  | 0.650           |
| x2x5  | 0.706           |
| x2x6  | 0.591           |
| x3x4  | 0.761           |
| x3x5  | 0.798           |
| x3x6  | 0.754           |
| x4x5  | 0.731           |
| x4x6  | 0.609           |
| x5x6  | 0.666           |

Notes: NR<sup>2</sup> = Nagelkerke R Square
