# Supplementary material
Source: publisher figshare collection journal article supplement (https://asha.figshare.com/articles/dataset/_/13641320)
Supplement: Supplementary file 2 [file 1]

Supplemental Material S2.

Examples of Items from the Elicitation Task (Desarrollo Morfosintático de Español, DEME)

|                                                                                                                                                                                                                                                                                                                                                                                                                                                               |                                                                                                                                                                                                                                                                                                                                                                                                                                                                                                                                                                                                                                                                                                                                                   |
|---------------------------------------------------------------------------------------------------------------------------------------------------------------------------------------------------------------------------------------------------------------------------------------------------------------------------------------------------------------------------------------------------------------------------------------------------------------|---------------------------------------------------------------------------------------------------------------------------------------------------------------------------------------------------------------------------------------------------------------------------------------------------------------------------------------------------------------------------------------------------------------------------------------------------------------------------------------------------------------------------------------------------------------------------------------------------------------------------------------------------------------------------------------------------------------------------------------------------|
| <p><b>Direct Object Pronouns</b><br/> <i>Prompt: Qué le hace la mamá a la niña?</i> ('What does the mom do to the girl?')</p>                                                                                                                                                                                                                                                | <p><b>Correct Responses:</b> <i>la peina</i> ('he/she combs her'), <i>la arregla</i> ('he/she gets her ready'), and <i>peinándola</i> ('combing-her')<br/> <b>Incorrect Responses:</b> object omissions <i>peinando</i> ('combing'); <i>arreglando</i> ('getting ready'), gender error <i>Esta peinándolo</i> ('he/she is combing him'), and number error <i>Está peinándolas</i> ('he/she is combing them-fem').</p>                                                                                                                                                                                                                                                                                                                             |
| <p><b>Articles and Adjectives</b><br/> <i>Prompt: Estos animales iban volando. Mira, estos se le pararon al niño. Cuáles se le pararon al niño?</i> ('These animals were flying towards the child. Look, these ones landed on the child.') A follow up question was introduced when needed <i>Cuáles?</i> ('which ones?') to facilitate the production of an adjective.</p>  | <p><b>Correct Responses:</b> Any article in agreement with the noun produced by the child <i>los pájaros rojos</i> ('the red birds'); <i>los pájaros</i> ('the birds'), <i>el pájaro</i> ('the bird'), <i>los rojos</i> ('the red ones'). Any adjective in agreement with the noun <i>los pájaros rojos</i> ('the red birds'), <i>los rojos</i> ('the red ones').<br/> <b>Incorrect Responses:</b> Article omissions <i>pájaros</i> ('birds'), gender errors, <i>la pájaro</i> ('the-Sgfem bird'), and number errors <i>el pájaros</i> ('the-MasSg birds'). Adjective omissions <i>el pájaro</i> ('the bird') and gender and/or number substitution <i>el pájaro roja</i> ('the red-fem bird'), <i>los pájaros rojo</i> ('the red-Sg birds').</p> |
| <p><b>Verbs</b><br/> <i>Prompt: Nos estamos divirtiendo mucho. Juan corre y nosotras...</i> ('We are having fun. Juan runs and we...').</p>                                                                                                                                                                                                                                | <p><b>Correct Responses:</b> Any verb conjugated in the 2<sup>nd</sup> person plural and in the present tense <i>bailamos</i> ('dance-plural'), <i>caminamos</i> ('walk-plural').<br/> <b>Incorrect Responses:</b> Tense or person errors such as <i>bailar</i> ('to dance') and <i>bailó</i> ('danced-sing').</p>                                                                                                                                                                                                                                                                                                                                                                                                                                |
| <p><b>Subjunctive</b><br/> <i>Prompt: Qué quiere la mamá que haga la niña?</i> ('What does the mom want the girl to do?').</p>                                                                                                                                                                                                                                             | <p><b>Correct Responses:</b> Any verb in the subjunctive mood (<i>Que se lave sus dientes</i>/'that she washes-subj her teeth').<br/> <b>Incorrect Responses:</b> Any verb in the indicative mood <i>lava</i> ('washes-ind'), and person/tense errors <i>lavar</i> ('to wash').</p>                                                                                                                                                                                                                                                                                                                                                                                                                                                               |
| <p><b>Plurals</b><br/> <i>Prompt: Aquí hay un tren y aquí hay tres...</i> ('here there is a train, and here there are three...').</p>                                                                                                                                                                                                                                      | <p><b>Correct Response:</b> <i>trenes</i> ('trains').<br/> <b>Incorrect Responses:</b> <i>trens</i> (trains-incorrect plural) and <i>tren</i> ('train')</p>                                                                                                                                                                                                                                                                                                                                                                                                                                                                                                                                                                                       |

Note = Unscorable responses (unintelligible utterances, no responses, and other unrelated responses) were also incorrect for all items.
